# Supplementary material for: Fluorinated graphenes as advanced biosensors – effect of fluorine coverage on electron transfer properties and adsorption of biomolecules
Source: Royal Society of Chemistry journal article supplement (doi:10.1039/c6nr00353b), 2016-01-01
Supplement: c6nr00353b1.pdf [file c6nr00353b1.pdf]

## Supporting information

# Fluorinated Graphenes as Advanced Biosensors - Effect of Fluorine Coverage on Electron Transfer Properties and Adsorption of Biomolecules

V. Urbanová,<sup>[a]</sup> F. Karlický,<sup>[a]</sup> A. Matěj,<sup>[a]</sup> F. Šembera,<sup>[b]</sup> Z. Janoušek,<sup>[b]</sup> J. A. Perman,<sup>[a]</sup> V. Ranc,<sup>[a]</sup> K. Čépe,<sup>[a]</sup> J. Michl,<sup>[b,c]</sup> M. Otyepka,<sup>\*[a]</sup> R. Zbořil<sup>\*[a]</sup>

[a] Regional Centre of Advanced Technologies and Materials, Department of Physical Chemistry, Faculty of Science, Palacky University in Olomouc, 17 listopadu 1192/12, 771 46 Olomouc, Czech Republic

[b] Institute of Organic Chemistry and Biochemistry AS CR, v.v.i., Flemingovo nam. 2., 166 10 Prague 6, Czech Republic.

[c] Department of Chemistry and Biochemistry, University of Colorado, Boulder, Colorado 80301, United States

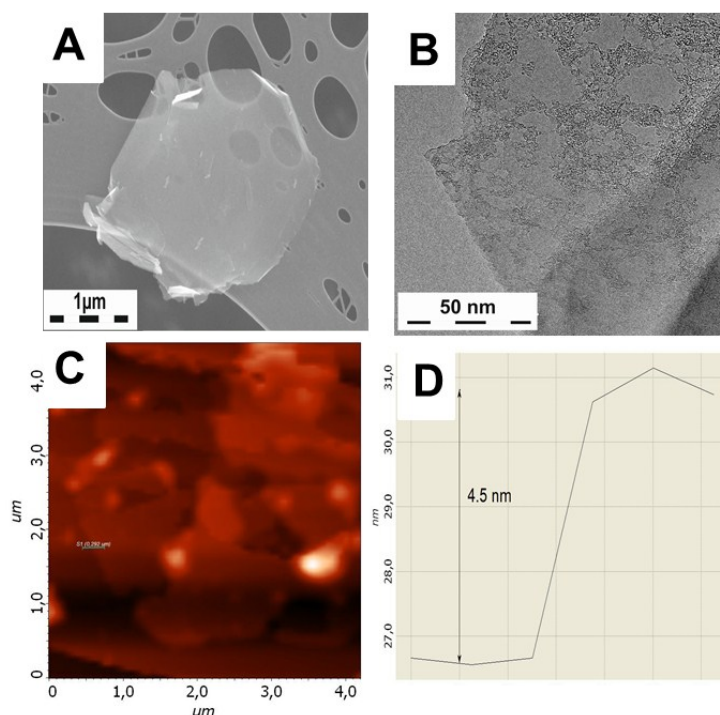

**Figure S1:** SEM (A), HRTEM (B), and AFM (C) including the selected AFM height profile (D) of the sheet in pristine graphene sample.

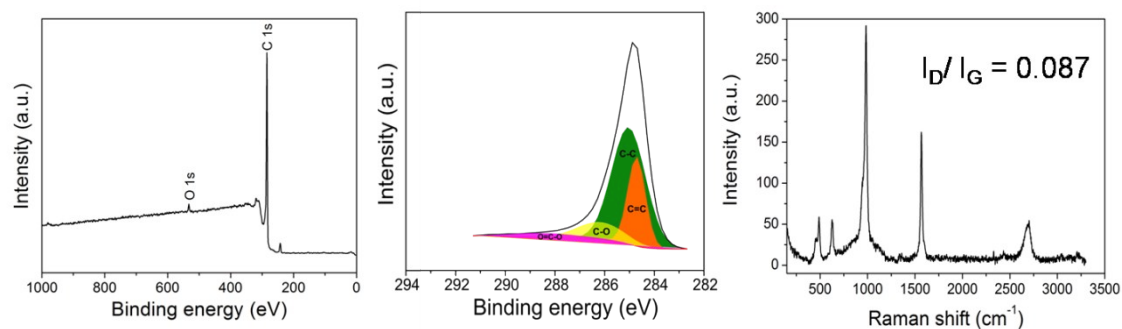

**Figure S2:** Survey XPS spectrum (left), high resolution C 1s XPS spectrum (middle) and Raman spectrum (right) of pristine graphene precursor used for controlled fluorination.

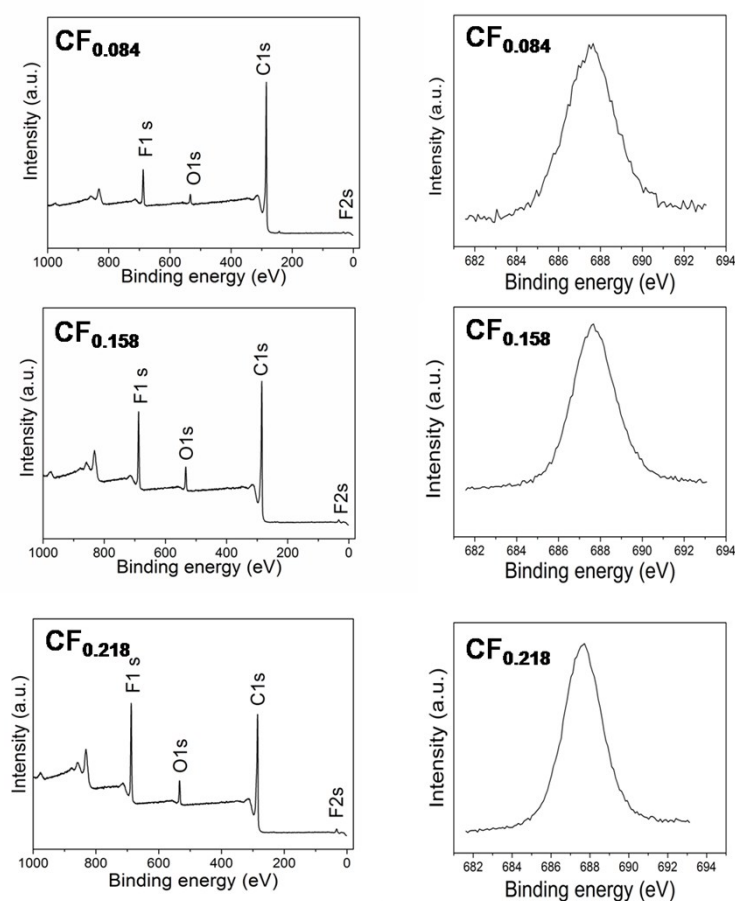

**Figure S3:** Survey and high resolution F 1s XPS spectra of the CF<sub>0.084</sub> (top), CF<sub>0.158</sub> (middle) and CF<sub>0.218</sub> (bottom) samples.

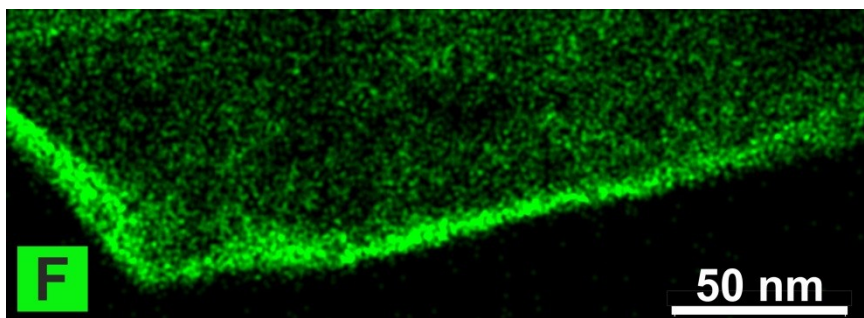

**Figure S4:** EDS chemical mapping of fluorine in CF<sub>0.158</sub> showing its homogeneous distribution within the sheet including edges.

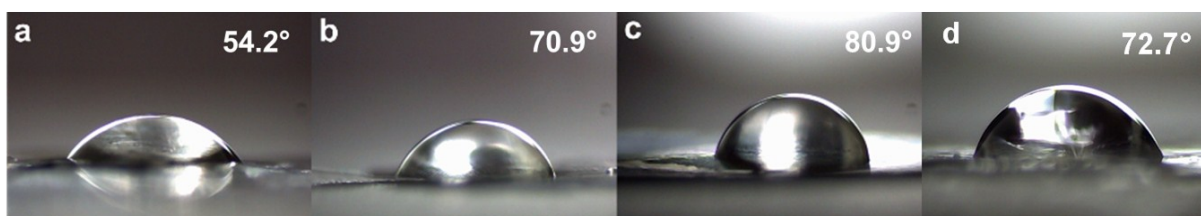

**Figure S5:** Contact angle measurement of (a) CF<sub>0.084</sub>, (b) CF<sub>0.158</sub>, (c) CF<sub>0.218</sub> and (d) HOPG.

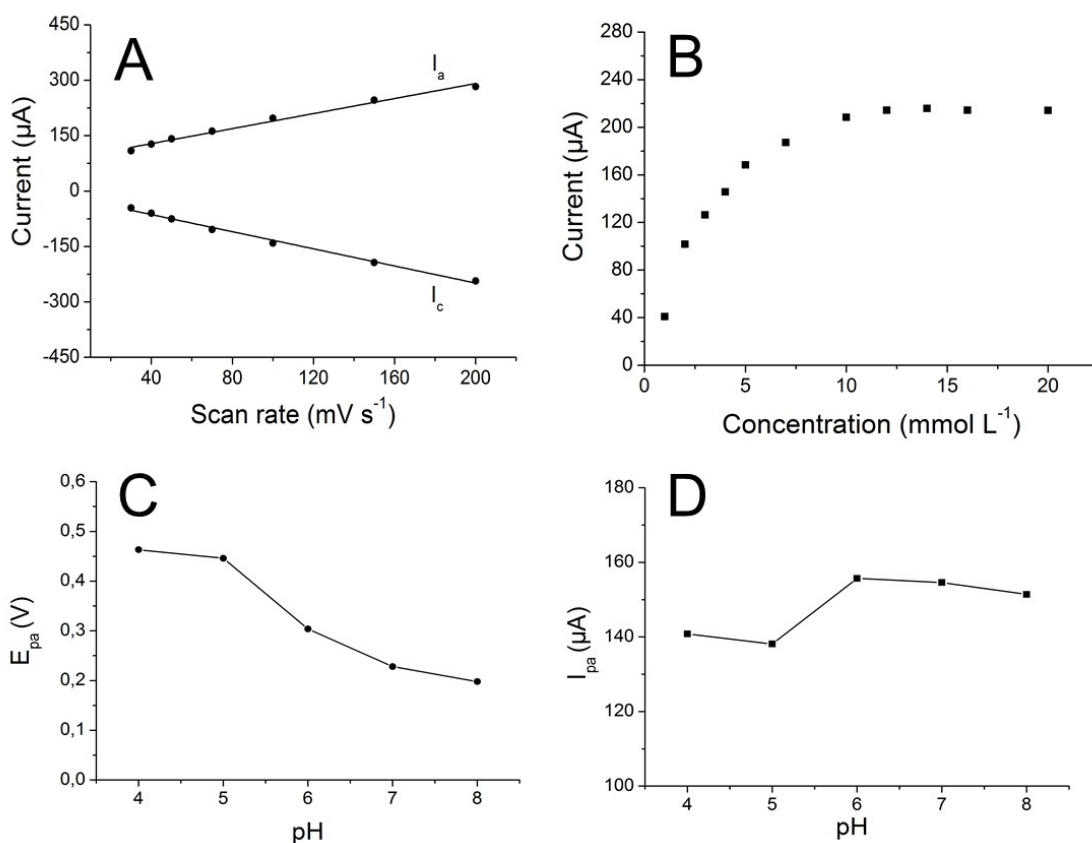

**Figure S6:** (A) Current peak responses of  $5 \text{ mmol L}^{-1}$  dopamine at various scan rates at GCE modified with  $\text{CF}_{0.084}$  in a PBS buffer solution (pH 7.0). (B) Concentration study of dopamine using GCE modified with  $\text{CF}_{0.084}$  recorded at a scan rate of  $50 \text{ mV s}^{-1}$  in PBS buffer solution (pH 7.0). (C) Oxidation current peak responses and (D) potentials of  $5 \text{ mmol L}^{-1}$  dopamine at various pH recorded at GCE modified with  $\text{CF}_{0.084}$  at a scan rate of  $50 \text{ mV s}^{-1}$  in PBS buffer solution (pH 7.0).

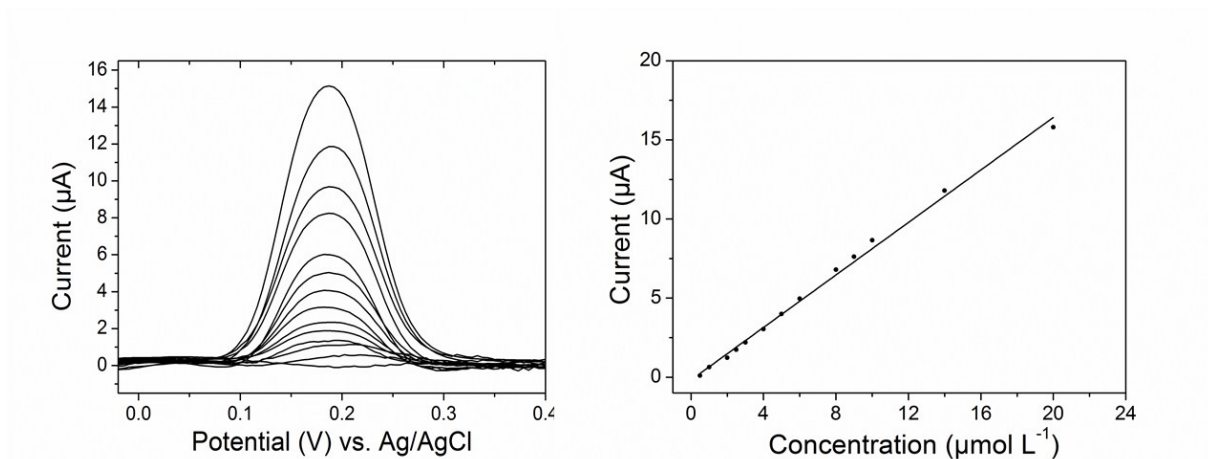

**Figure S7:** Square-wave voltammetry responses to increasing concentration of dopamine (left) with corresponding linear regression (right). All measurements were performed in PBS buffer (pH 7.0) using GCE modified with CF<sub>0.084</sub>. Amplitude 25 mV, step height 5 mV, frequency 25Hz.
